# Supplementary material for: Explaining Differences in the Acceptability of 99DOTS, a Cell Phone–Based Strategy for Monitoring Adherence to Tuberculosis Medications: Qualitative Study of Patients and Health Care Providers
Source: PubMed Central journal article supplement (PMC7428900; doi:10.2196/16634), 2020-07-31
Supplement: mhealth_v8i7e16634_app1.pdf [file mhealth_v8i7e16634_app1.pdf]

**Figure S1. Coding scheme for 99DOTS patient interviews**

| Component of the UTAUT framework | Parent nodes                                         | Child nodes                                                      |
|----------------------------------|------------------------------------------------------|------------------------------------------------------------------|
| <b>Performance expectancy</b>    | Patient understanding of 99DOTS                      | Lack of clarity on the purpose of 99DOTS                         |
|                                  |                                                      | Good understanding of 99DOTS                                     |
|                                  |                                                      | Poor understanding of 99DOTS                                     |
|                                  | Usefulness for medication adherence and TB treatment | Useful for TB medication adherence                               |
|                                  |                                                      | Helpful for ART adherence                                        |
|                                  |                                                      | SMS reminders were helpful                                       |
|                                  | Not useful for medication adherence and TB treatment | Not useful for TB medication adherence                           |
|                                  |                                                      | Not helpful for ART adherence                                    |
|                                  |                                                      | SMS reminders not helpful                                        |
|                                  | Relationship with providers                          | Better relationship with providers                               |
|                                  |                                                      | Poorer relationship with providers                               |
|                                  | Other life benefits of 99DOTS                        | Able to work and study                                           |
|                                  |                                                      | Easy to pick up HIV and TB medications at same visit             |
|                                  |                                                      | Saves travel time and money from not having to visit DOT centers |
|                                  |                                                      | Other positive statements on usefulness                          |
|                                  | Technical problems with phone                        | Electricity problems                                             |
|                                  |                                                      | Battery problems                                                 |
|                                  |                                                      | Network problems                                                 |
|                                  | Phone access                                         | Has good individual phone access                                 |
|                                  |                                                      | No phone available                                               |
|                                  |                                                      | Shared phone                                                     |
|                                  |                                                      | Switched cell phone numbers                                      |
|                                  |                                                      | Depending on others to call                                      |
|                                  |                                                      | Other problems with phone access                                 |

|                                |                                                         |                                                                           |
|--------------------------------|---------------------------------------------------------|---------------------------------------------------------------------------|
| <b>Effort expectancy</b>       | Poor literacy or steep technology learning curve        | Poor literacy or lack of knowledge of English as a barrier to ease of use |
|                                |                                                         | Poor cell phone literacy                                                  |
|                                | Barriers caused directly by medication                  | Difficulty in taking TB/ART medication itself                             |
|                                |                                                         | Medication side effects                                                   |
|                                |                                                         | Not calling in spite of side effects                                      |
|                                | Issues with envelope                                    | Numbers not visible                                                       |
|                                |                                                         | Functioning of envelopes                                                  |
|                                |                                                         | Not given medication in envelope                                          |
|                                |                                                         | Problem understanding envelope labeling                                   |
|                                | Patient behavior                                        | Fatigue of calling                                                        |
|                                |                                                         | No calling of fatigue reported                                            |
|                                |                                                         | Calling at a different time from medication-taking                        |
|                                |                                                         | Calling the same number repeatedly or calling a number not in envelope    |
|                                |                                                         | Forgetting to call after taking tablets                                   |
|                                | <b>Social influences</b>                                | Influence of family or community                                          |
| Decreased family involvement   |                                                         |                                                                           |
| Stigma or privacy concerns     |                                                         |                                                                           |
| <b>Facilitating conditions</b> | Influence of healthcare worker interaction with patient | Further health system interaction after starting 99DOTS                   |
|                                |                                                         | No further health system interaction after starting 99DOTS                |
|                                | Quality of counseling                                   | Good counseling given about 99DOTS                                        |
|                                |                                                         | Poor counseling given about 99DOTS                                        |
|                                | Other health system factors                             | Barriers caused by distance from health center                            |
