# Supplementary material for: Explaining Differences in the Acceptability of 99DOTS, a Cell Phone–Based Strategy for Monitoring Adherence to Tuberculosis Medications: Qualitative Study of Patients and Health Care Providers
Source: PubMed Central journal article supplement (PMC7428900; doi:10.2196/16634), 2020-07-31
Supplement: mhealth_v8i7e16634_app2.pdf [file mhealth_v8i7e16634_app2.pdf]

**Figure S2. Coding scheme for 99DOTS healthcare provider interviews**

| Component of the UTAUT framework                | Parent nodes                                                                                | Child nodes                                                                    |
|-------------------------------------------------|---------------------------------------------------------------------------------------------|--------------------------------------------------------------------------------|
| Performance expectancy                          | Barriers to usefulness for healthcare providers                                             | SMS alerts/dashboard unhelpful for management or overwhelming                  |
|                                                 |                                                                                             | Does not save time or lowers work efficiency                                   |
|                                                 | Barriers to usefulness for patients, as perceived by healthcare providers                   | Reduced patients interactions leading to reduced follow-up                     |
|                                                 | Facilitators of usefulness for healthcare providers <span style="float: right;">Text</span> | SMS alerts or dashboard helpful for patient management                         |
|                                                 |                                                                                             | Saves time or improves work efficiency                                         |
|                                                 | Facilitators of usefulness to patients, as perceived by healthcare providers                | Improves quality of care for patients                                          |
|                                                 |                                                                                             | Better patient understanding of medications and improved adherence             |
|                                                 |                                                                                             | Being able to pick up antiretroviral therapy and TB therapy at the same clinic |
|                                                 |                                                                                             | Patients perceive improved relationships with providers                        |
|                                                 |                                                                                             | Patient able to work / study without constraints of facility-based DOT         |
| Interactive voice response perceived as helpful |                                                                                             |                                                                                |
| Effort expectancy                               | Barriers to ease of use for healthcare providers                                            | Difficulties learning 99DOTS                                                   |
|                                                 |                                                                                             | Difficulty in accessing the SMS/Dashboard alerts                               |
|                                                 |                                                                                             | Issues with dependability of 99DOTS technology                                 |
|                                                 |                                                                                             | Does not understand dashboard/SMS alerts                                       |
|                                                 |                                                                                             | Does not understand phone reporting process                                    |
|                                                 | Barriers to patient ease of use, as perceived by healthcare providers                       | Providers think patients find 99DOTS hard to use                               |
|                                                 |                                                                                             | Patient with poor phone access                                                 |
|                                                 | Facilitators for ease of use for healthcare providers                                       | Positive statements on ease of use for HCP                                     |
|                                                 |                                                                                             | Good provider understanding as evidence of ease of use                         |
|                                                 | Facilitators for patient ease of use, as perceived by healthcare providers                  | Positive statements on ease of use for patients                                |
| Social influences                               | Influence on provider communication                                                         | 99DOTS facilitated communication among providers                               |
|                                                 |                                                                                             | 99DOTS was barrier to communication among providers                            |
| Facilitating conditions                         | Training of HCPs in 99DOTS implementation                                                   | No or inadequate training in 99DOTS                                            |
|                                                 |                                                                                             | Sufficient training provided in 99DOTS                                         |
|                                                 | Supply chain problems                                                                       | Supply chain problem for envelopes                                             |
|                                                 |                                                                                             | No supply chain problem for envelopes                                          |
|                                                 |                                                                                             | Supply chain problem for medications                                           |
|                                                 |                                                                                             | No supply chain problem for medications                                        |
